# Supplementary material for: Synthesis, structure, spectra and reactivity of iron(iii) complexes of facially coordinating and sterically hindering 3N ligands as models for catechol dioxygenases
Source: Royal Society of Chemistry journal article supplement (doi:10.1039/b809142k), 2008-01-01
Supplement: b809142k.pdf [file b809142k.pdf]

Supporting information

**Table S1** Electrochemical data <sup>a</sup> for [Fe(L)Cl<sub>3</sub>] and [Fe(L)(DBC)Cl] <sup>b</sup> in DMF at 25.0 ± 0.2 °C at a scan rate of 50 mV s<sup>-1</sup> (CV) and 5 mV s<sup>-1</sup> (DPV)

| Complexes                | $E_{pc}$<br>(V) | $E_{pa}$<br>(V) | $\Delta E_p$<br>(mV) | $E_{1/2}$ (V) |        | Redox process                        |
|--------------------------|-----------------|-----------------|----------------------|---------------|--------|--------------------------------------|
|                          |                 |                 |                      | CV            | DPV    |                                      |
| [Fe(L1)Cl <sub>3</sub> ] | -0.510          | -0.358          | 152                  | -0.434        | -0.425 | Fe <sup>III</sup> → Fe <sup>II</sup> |
| +H <sub>2</sub> DBC      | -0.380          | -0.162          | 218                  | -0.271        | -0.280 | DBSQ → H <sub>2</sub> DBC            |
|                          | -0.508          | -0.370          | 138                  | -0.439        | -0.412 | Fe <sup>III</sup> → Fe <sup>II</sup> |
| [Fe(L1)(DBC)Cl]          | -0.324          | -0.166          | 158                  | -0.245        | -0.223 | DBSQ → DBC                           |
|                          | –               | –               | –                    | –             | –      | Fe <sup>III</sup> → Fe <sup>II</sup> |
| [Fe(L2)Cl <sub>3</sub> ] | -0.488          | -0.360          | 128                  | -0.424        | -0.411 | Fe <sup>III</sup> → Fe <sup>II</sup> |
| +H <sub>2</sub> DBC      | -0.376          | -0.156          | 220                  | -0.266        | -0.255 | DBSQ → H <sub>2</sub> DBC            |
|                          | -0.500          | -0.376          | 124                  | -0.438        | -0.401 | Fe <sup>III</sup> → Fe <sup>II</sup> |
| [Fe(L2)(DBC)Cl]          | -0.332          | -0.160          | 172                  | -0.246        | -0.213 | DBSQ → DBC                           |
|                          | –               | –               | –                    | –             | –      | Fe <sup>III</sup> → Fe <sup>II</sup> |
| [Fe(L3)Cl <sub>3</sub> ] | -0.502          | -0.336          | 166                  | -0.419        | -0.402 | Fe <sup>III</sup> → Fe <sup>II</sup> |
| +H <sub>2</sub> DBC      | -0.384          | -0.140          | 244                  | -0.262        | -0.275 | DBSQ → H <sub>2</sub> DBC            |
|                          | -0.510          | -0.342          | 168                  | -0.426        | -0.431 | Fe <sup>III</sup> → Fe <sup>II</sup> |
| [Fe(L3)(DBC)Cl]          | -0.320          | -0.150          | 170                  | -0.235        | -0.217 | DBSQ → DBC                           |

|                          |        |        |     |        |        |                                      |
|--------------------------|--------|--------|-----|--------|--------|--------------------------------------|
|                          | –      | –      | –   | –      | –      | Fe <sup>III</sup> → Fe <sup>II</sup> |
| [Fe(L4)Cl <sub>3</sub> ] | -0.422 | -0.278 | 144 | -0.350 | -0.329 | Fe <sup>III</sup> → Fe <sup>II</sup> |
| +H <sub>2</sub> DBC      | -0.358 | -0.134 | 224 | -0.246 | -0.241 | DBSQ → H <sub>2</sub> DBC            |
|                          | -0.498 | -0.356 | 142 | -0.427 | -0.435 | Fe <sup>III</sup> → Fe <sup>II</sup> |
| [Fe(L4)(DBC)Cl]          | -0.276 | -0.138 | 138 | -0.207 | -0.209 | DBSQ → DBC                           |
|                          | –      | –      | –   | –      | –      | Fe <sup>III</sup> → Fe <sup>II</sup> |
| [Fe(L5)Cl <sub>3</sub> ] | -0.377 | -0.149 | 228 | -0.263 | -0.276 | Fe <sup>III</sup> → Fe <sup>II</sup> |
| +H <sub>2</sub> DBC      | -0.082 | -0.018 | 64  | -0.050 | -0.031 | DBSQ → H <sub>2</sub> DBC            |
|                          | -0.378 | -0.262 | 116 | -0.320 | -0.308 | Fe <sup>III</sup> → Fe <sup>II</sup> |
| [Fe(L5)(DBC)Cl]          | –      | –      | –   | –      | -0.039 | DBSQ → DBC                           |
|                          | -0.362 | -0.299 | 63  | -0.330 | -0.314 | Fe <sup>III</sup> → Fe <sup>II</sup> |
| [Fe(L6)Cl <sub>3</sub> ] | -0.364 | -0.147 | 217 | -0.255 | -0.280 | Fe <sup>III</sup> → Fe <sup>II</sup> |
| +H <sub>2</sub> DBC      | -0.068 | 0.016  | 84  | -0.026 | -0.045 | DBSQ → H <sub>2</sub> DBC            |
|                          | -0.356 | -0.230 | 126 | -0.293 | -0.273 | Fe <sup>III</sup> → Fe <sup>II</sup> |
| [Fe(L6)(DBC)Cl]          | -0.103 | 0.027  | 130 | -0.038 | -0.053 | DBSQ → DBC                           |
|                          | –      | –      | –   | –      | –      | Fe <sup>III</sup> → Fe <sup>II</sup> |
| [Fe(L7)Cl <sub>3</sub> ] | -0.430 | -0.230 | 200 | -0.330 | -0.312 | Fe <sup>III</sup> → Fe <sup>II</sup> |
| +H <sub>2</sub> DBC      | 0.042  | -0.069 | 111 | -0.013 | +0.025 | DBSQ → H <sub>2</sub> DBC            |

|                 |        |        |     |        |        |                                      |
|-----------------|--------|--------|-----|--------|--------|--------------------------------------|
|                 | -0.396 | -0.208 | 188 | -0.302 | -0.289 | Fe <sup>III</sup> → Fe <sup>II</sup> |
| [Fe(L7)(DBC)Cl] | –      | –      | –   | –      | -0.017 | DBSQ → DBC                           |
|                 | –      | –      | –   | –      | –      | Fe <sup>III</sup> → Fe <sup>II</sup> |

---

<sup>a</sup> Potential measured vs. Ag(s)/AgNO<sub>3</sub> (0.01 M, 0.10 M TBAP); add 0.544 V to convert to NHE

<sup>b</sup> Generated by adding one equivalent of H<sub>2</sub>DBC and two equivalents of triethylamine to complex [Fe(L)Cl<sub>3</sub>].
